# Supplementary material
Source: PubMed Central journal article supplement (PMC4689192)
Supplement: NIHMS739176-supplement-ESI.pdf [file NIHMS739176-supplement-ESI.pdf]

# Poly(Vinyl Sulfonate) Facilitates bFGF-Induced Cell Proliferation

*Thi H. Nguyen, Samantha J. Paluck, Andrew J. McGahran, and Heather D. Maynard\**

Department of Chemistry and Biochemistry, University of California, Los Angeles, 607

Charles E. Young Drive East, Los Angeles, California 90095-1569 United States

## **Supporting Information**

**a**

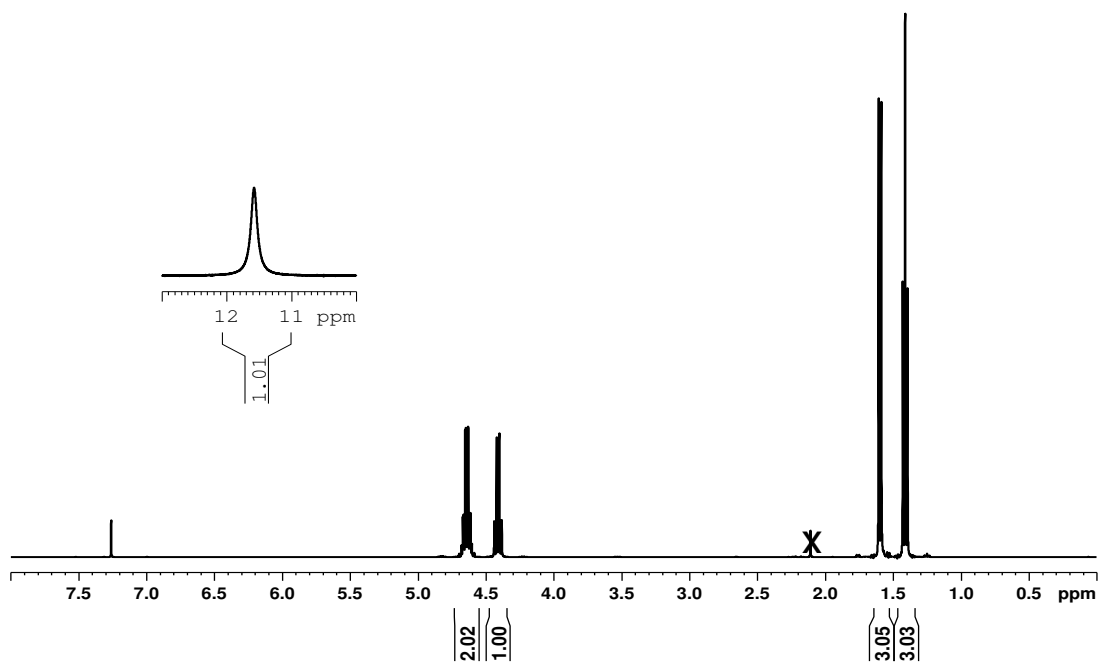

**b**

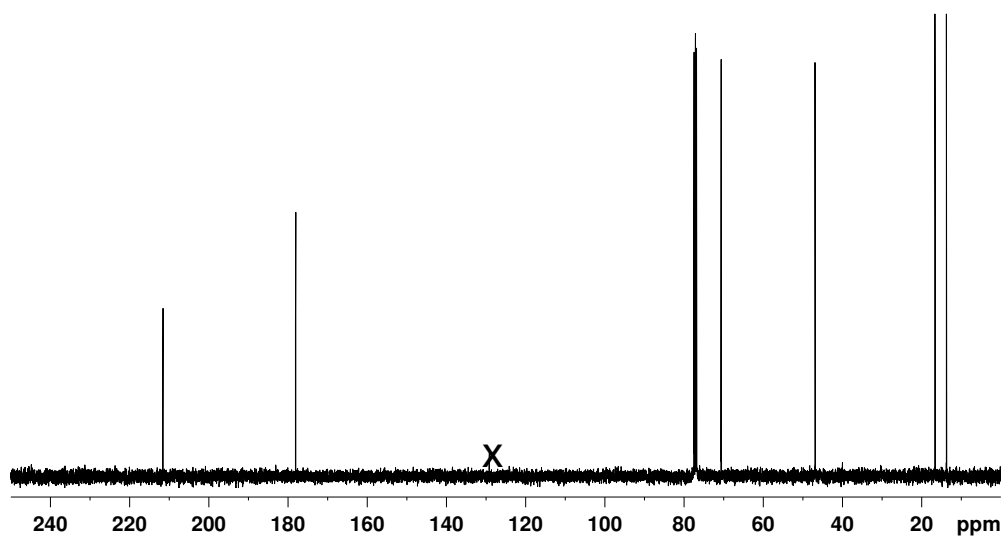

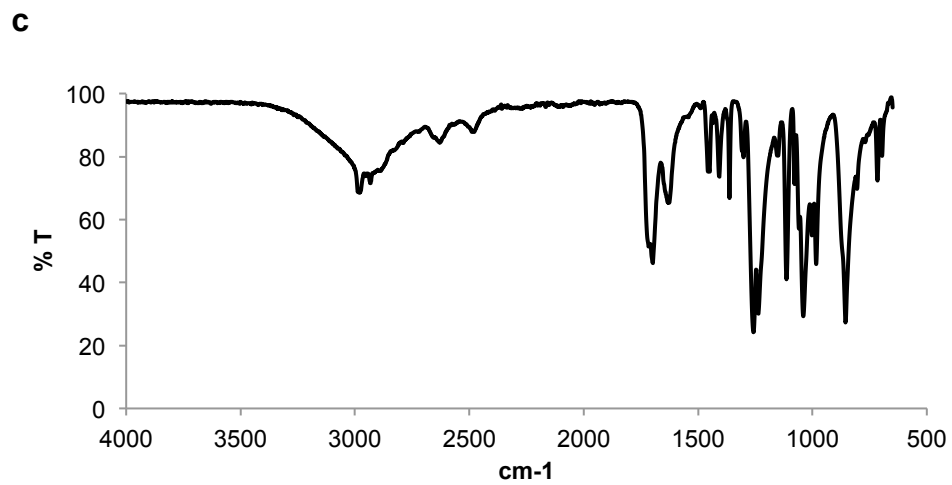

**Figure S1.** Characterization of the CTA: a) <sup>1</sup>H NMR spectrum in CDCl<sub>3</sub>, b) <sup>13</sup>C NMR spectrum in CDCl<sub>3</sub>, c) FTIR spectrum.

**a**

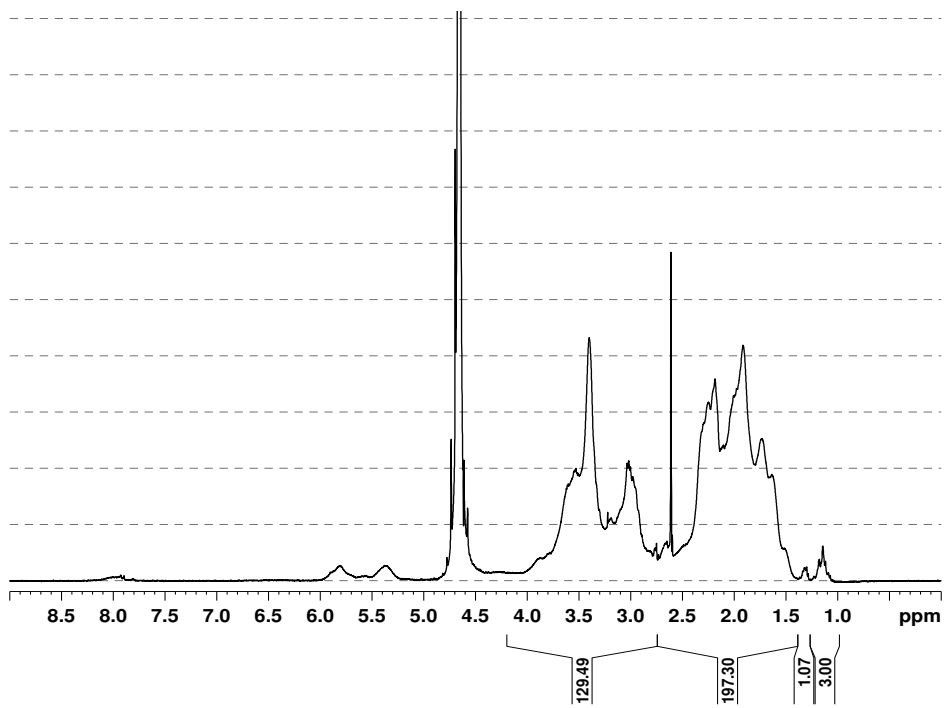

**b**

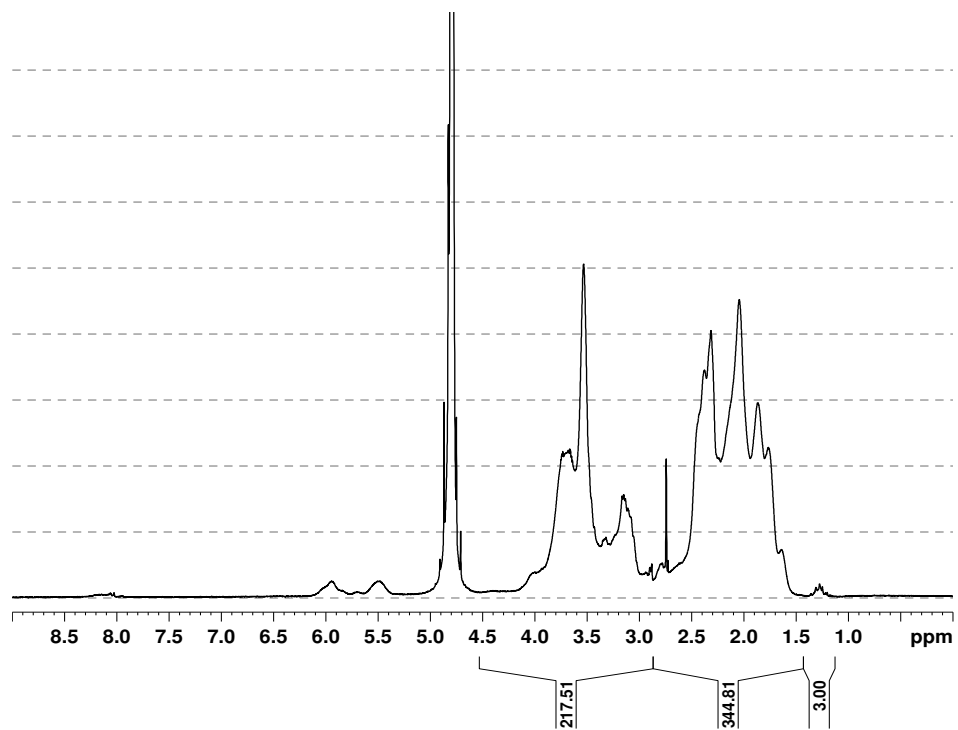

c

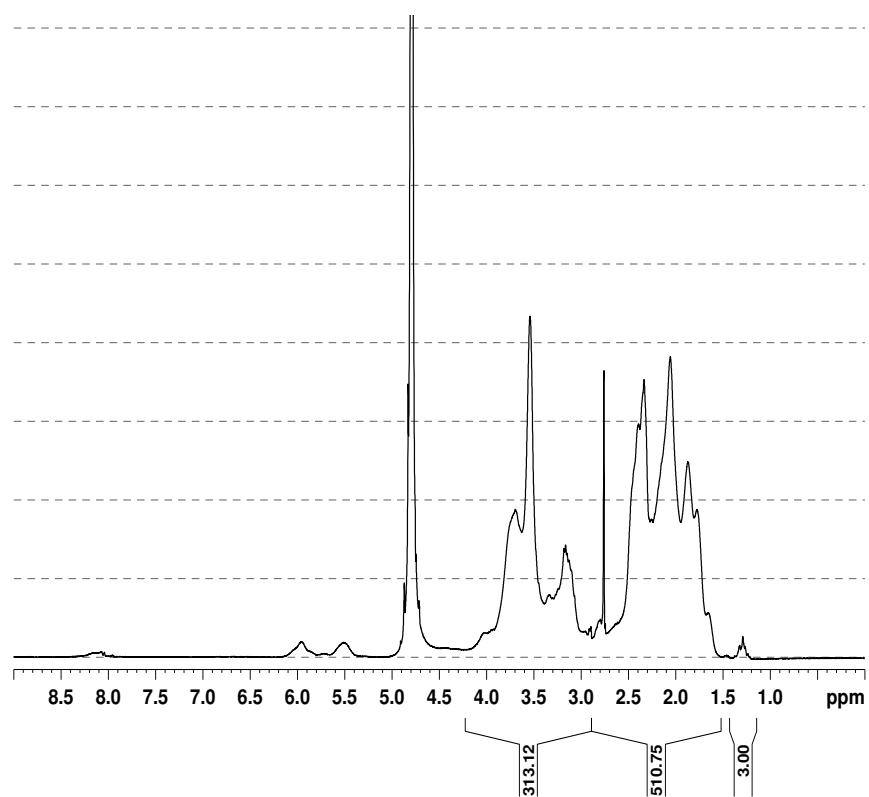

d

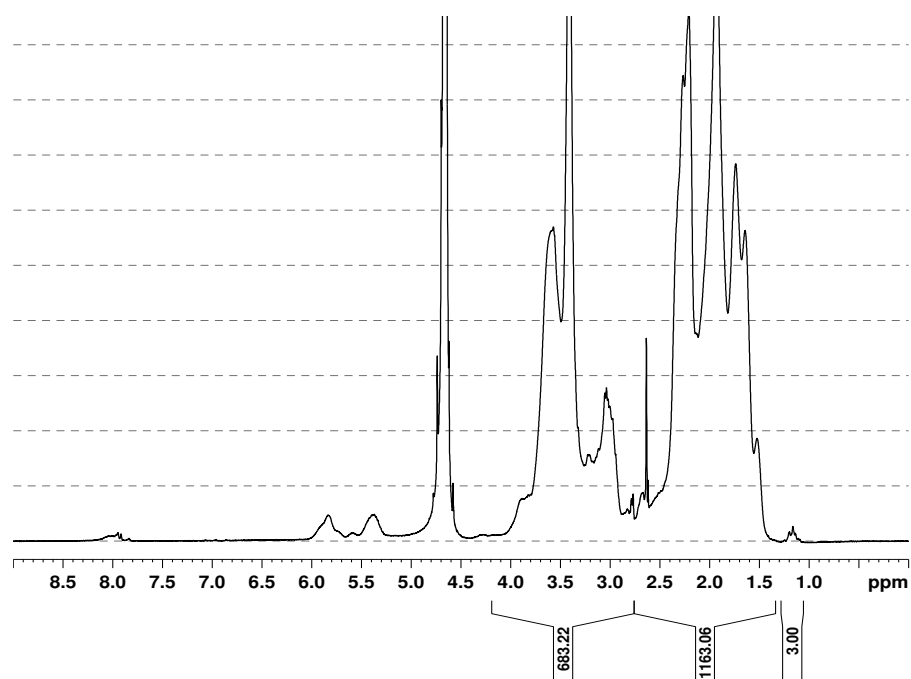

**Figure S2.** <sup>1</sup>H NMR spectra of the pVS polymers. a) pVS 14.4 kDa, b) pVS 24.6 kDa, c) pVS 35.9 kDa, and d) pVS 80.3 kDa.

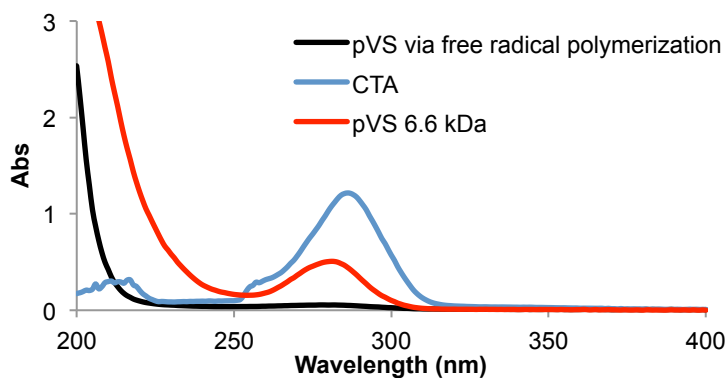

**Figure S3.** UV-Vis spectrum of pVS 6.6 kDa synthesized via RAFT polymerization, compared to the UV-Vis spectra of pVS prepared via free radical polymerization and the CTA in MilliQ-water.

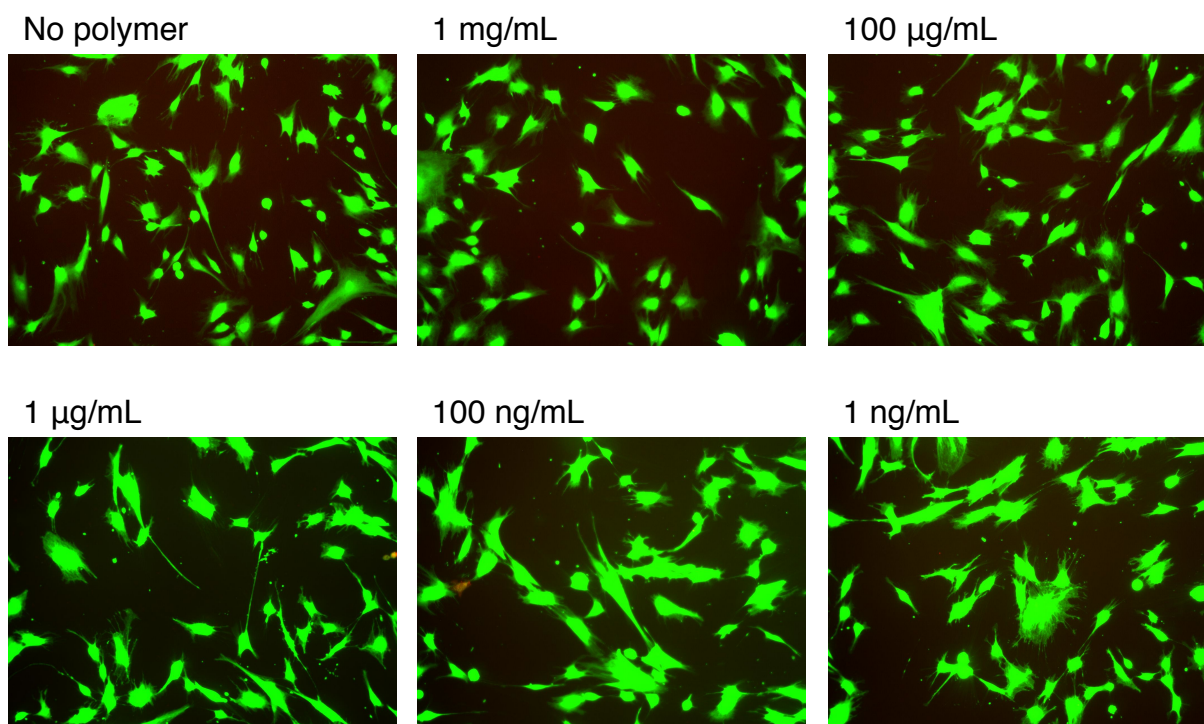

**Figure S4.** Representative fluorescent images of HDF cells in LIVE/DEAD<sup>®</sup> viability/cytotoxicity assay. HDF cells were incubated with pVS 80.3 kDa at various concentrations for 24 hours before they were washed and stained with calcein AM and ethidium homodimer-1. The fluorescent images of the samples were captured on an Axiovert 200 microscope (equipped with an AxioCam MRm camera and FluoArc mercury lamp) under a green and a red channel and overlaid to produce the images here.
